# Supplementary material for: Fabrication of a Simultaneous Highly Transparent and Highly Hydrophobic Fibrous Films
Source: MDPI journal article supplement (doi:10.3390/app11125565), 2021-06-16
Supplement: s1 [file s1]

## Article

# Fabrication of a Simultaneous Highly Transparent and Highly Hydrophobic Fibrous Films

Doo-Hyeb Youn \*, Kyu-Sung Lee, Sun-Kyu Jung and Mangu Kang

New Materials Research Group, Electronics and Telecommunications Research Institute, 218 Gajeong-ro, Yuseong-gu, Daejeon 34129, Korea; kyusung.lee@etri.re.kr (K.-S.L.); skjung@etri.re.kr (S.-K.J.); 10009kang@etri.re.kr (M.K.)

\* Correspondence: dhyoun@etri.re.kr

## Supplementary Materials

**Table S1.** Water contact angle obtained for randomly distributed electrospun fibers.

| Deposition time                 | 10 s       | 20 s       | 30 s        | 40 s        |
|---------------------------------|------------|------------|-------------|-------------|
| Contact Angle (Average)[degree] | 73.2 ± 1.8 | 98.8 ± 0.4 | 116.0 ± 0.7 | 125.6 ± 0.7 |
| Left Angle [degree]             | 73.0       | 98.8       | 117.0       | 126.4       |
| Right Angle [degree]            | 73.4       | 98.8       | 116.4       | 126.5       |
| Hysteresis [degree]             | 0.37       | 0.01       | 0.59        | 0.1         |
| Height from Top to Base [mm]    | 0.95       | 1.33       | 1.43        | 1.49        |
| Base Line Length [mm]           | 2.66       | 2.37       | 1.87        | 1.59        |
| Base Area [mm <sup>2</sup> ]    | 5.55       | 4.41       | 2.74        | 1.98        |
| Drop Volume [uL]                | 3.24       | 4.28       | 3.66        | 3.35        |
| Wetting Energy [mN/m]           | 21.1       | 26.2       | 32.6        | 43.2        |
| Spreading Coeff. [mN/m]         | −51.7      | −84.0      | −105.4      | −116.0      |
| Work of Adhesion [mN/m]         | 93.0       | 61.6       | 40.2        | 29.6        |

**Table S2.** Water contact angle obtained for aligned electrospun fibers.

| Deposition time                 | 10 s       | 20 s        | 30 s        | 40 s        |
|---------------------------------|------------|-------------|-------------|-------------|
| Contact Angle (Average)[degree] | 76.5 ± 2.2 | 107.5 ± 5.1 | 125.6 ± 6.8 | 141.8 ± 2.7 |
| Left Angle [degree]             | 77.6       | 108.0       | 124.8       | 141.1       |
| Right Angle [degree]            | 77.2       | 108.0       | 125.3       | 139.5       |
| Hysteresis [degree]             | 0.41       | 0.06        | 0.5         | 1.59        |
| Height from Top to Base [mm]    | 1.02       | 1.31        | 1.52        | 1.64        |
| Base Line Length [mm]           | 2.65       | 1.97        | 1.65        | 1.2         |
| Base Area [mm <sup>2</sup> ]    | 5.5        | 3.1         | 2.13        | 1.13        |
| Drop Volume [uL]                | 3.45       | 3.3         | 3.6         | 3.44        |
| Wetting Energy [mN/m]           | 15.9       | 22.55       | 41.81       | 56.01       |
| Spreading Coeff. [mN/m]         | −56.9      | −95.3       | −114.6      | −128.8      |
| Work of Adhesion [mN/m]         | 88.7       | 50.1        | 30.99       | 16.79       |

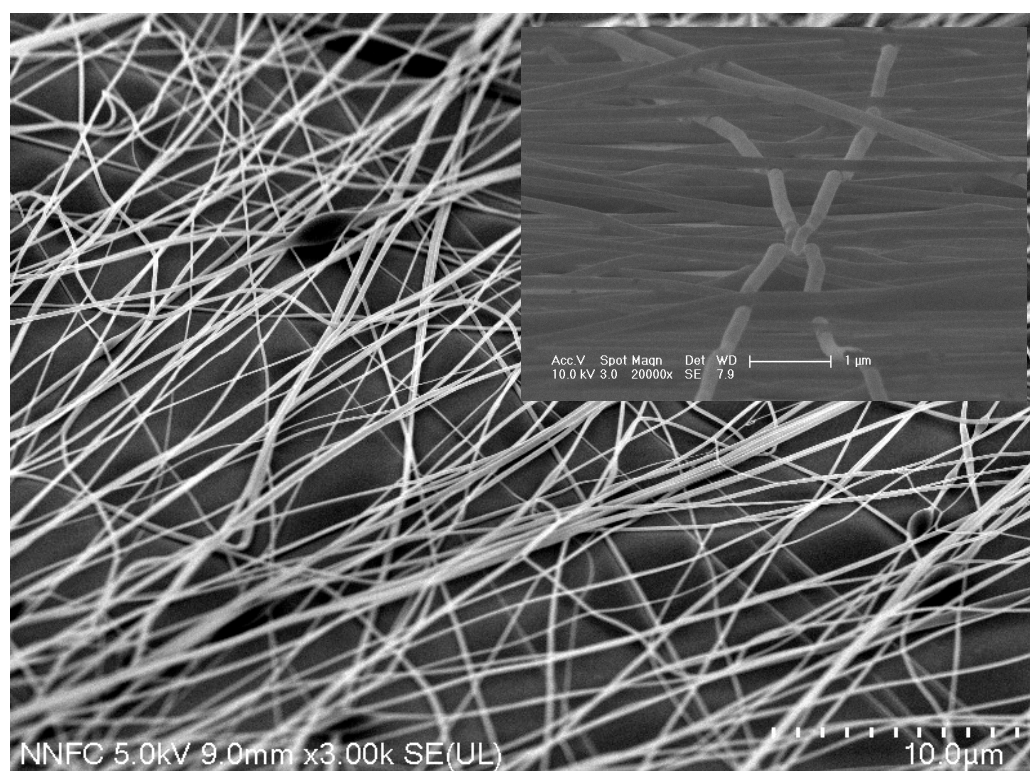**Figure S1.** Surface roughness of randomly distributed electrospun fibers.

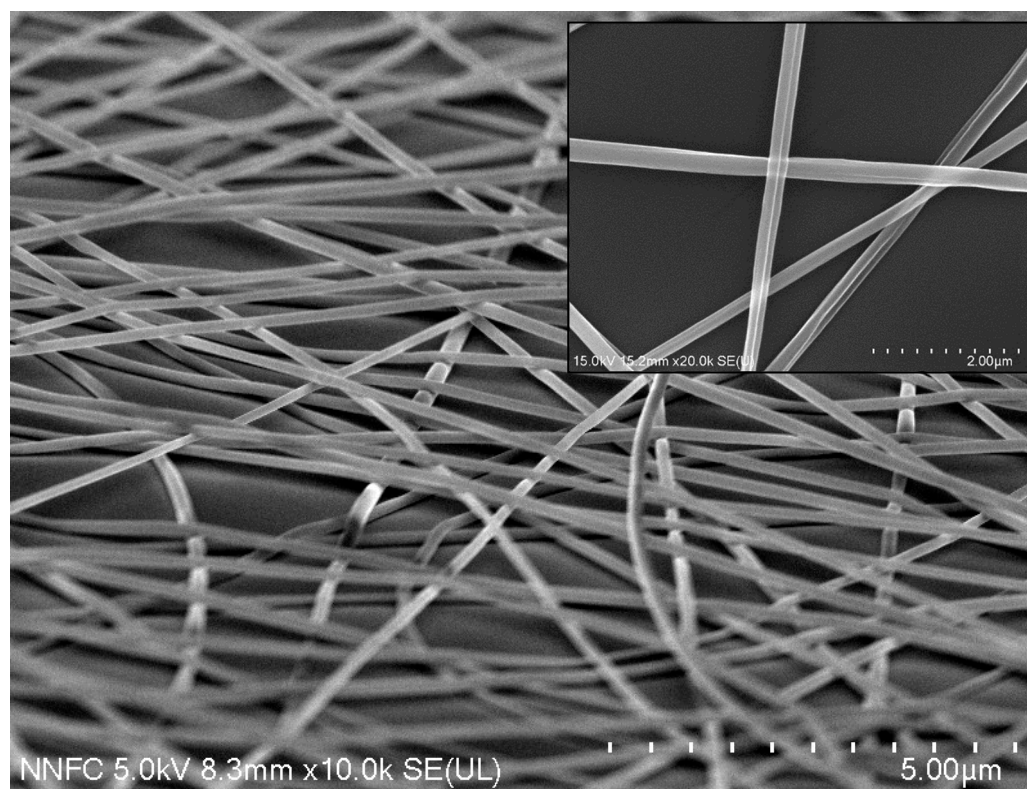

**Figure S2.** SEM surface morphology of the randomly distributed fibers.
